# Supplementary material for: Interface engineering for gain perovskite photodetectors with extremely high external quantum efficiency
Source: Royal Society of Chemistry journal article supplement (doi:10.1039/d0ra06618d), 2020-01-01
Supplement: d0ra06618d1.pdf [file d0ra06618d1.pdf]

## Supporting Information

Interface engineering for gain perovskite photodetectors with an extremely high external quantum efficiency

Xinyu Zhao<sup>#1</sup>, Lixiang Huang<sup>#1</sup>, Yukun Wang<sup>#1\*</sup>, Xinglin Zhu<sup>1</sup>, Lei Li<sup>1</sup>, Guoxin Li<sup>1</sup>, Wenhong Sun<sup>1,2\*</sup>

<sup>1</sup> Research Center for Optoelectronic Materials and Devices, School of Physical Science and Technology, Guangxi University, Nanning 530004, China.

<sup>2</sup> Key Laboratory of New Processing Technology for Nonferrous Metals and Materials (Ministry of Education), Guangxi University, Nanning 530004, China.

\*corresponding e-mail address: [ykwang0929@163.com](mailto:ykwang0929@163.com)(Y.Wang);  
[20180001@gxu.edu.cn](mailto:20180001@gxu.edu.cn)(W.Sun)

#These authors contributed equally

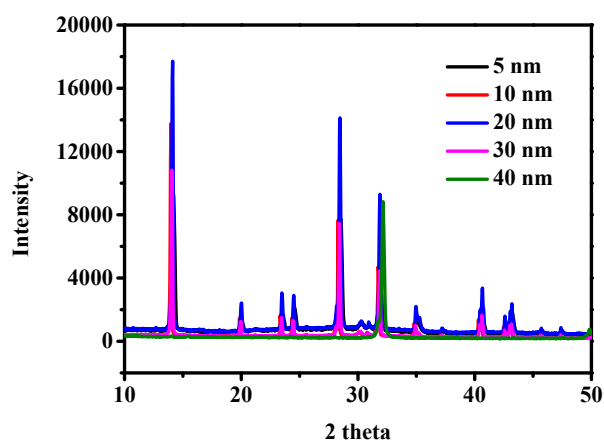

Figure S1 Absolute XRD of perovskite films on different thicknesses of C<sub>60</sub> layer

a

5 nm

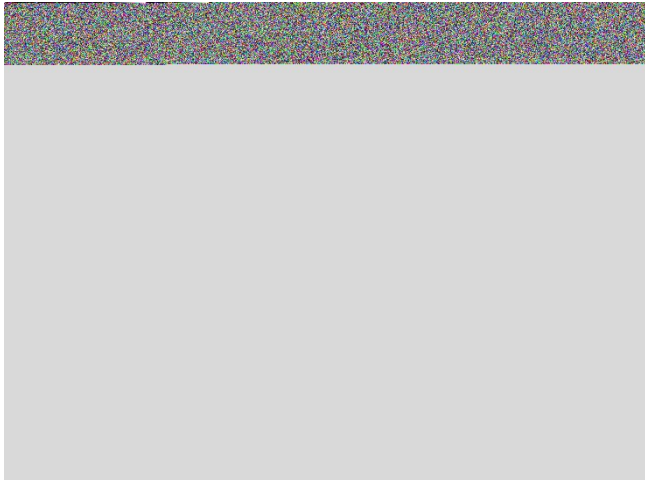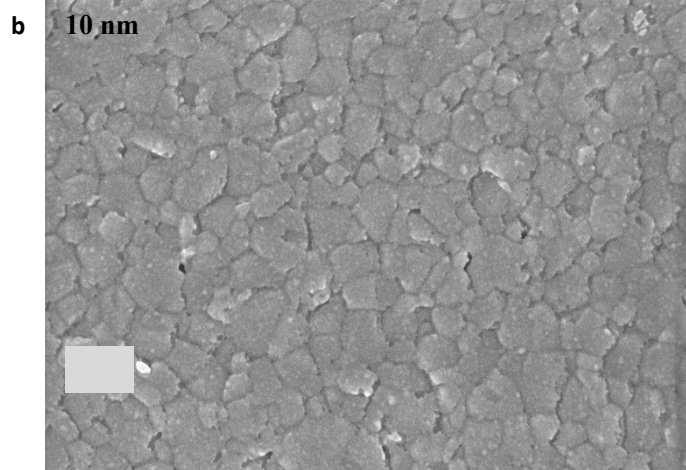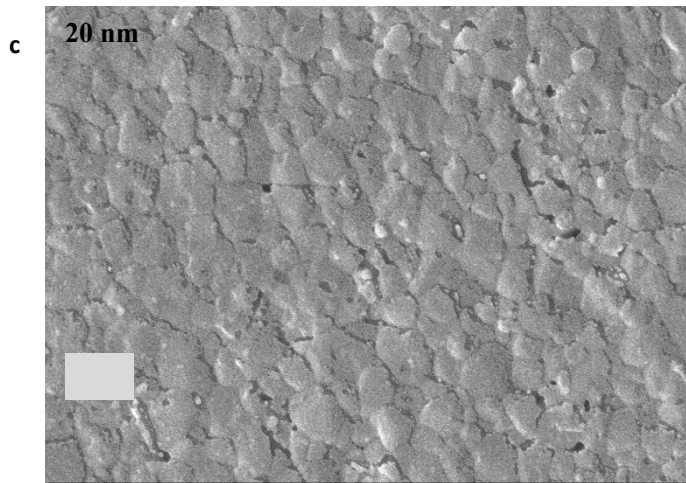

**30 nm**

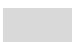

d

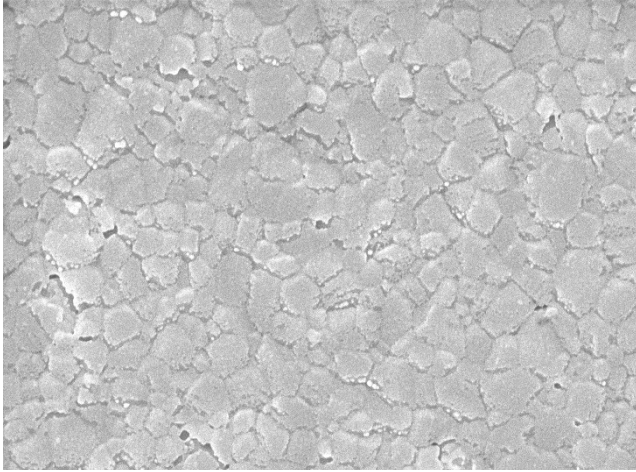

e

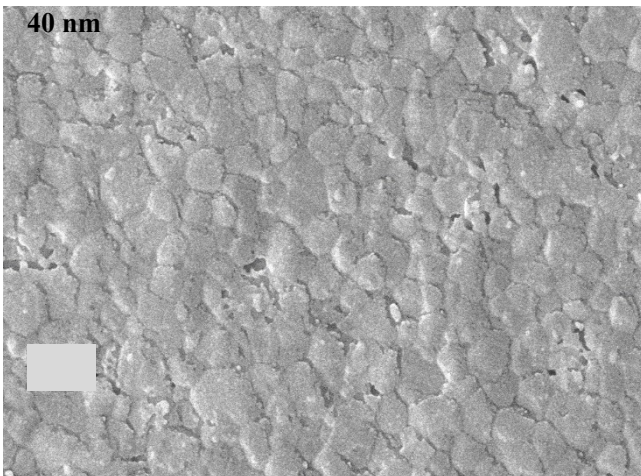

Figure S2 a-e SEM of perovskite films on different thicknesses of C<sub>60</sub> layer

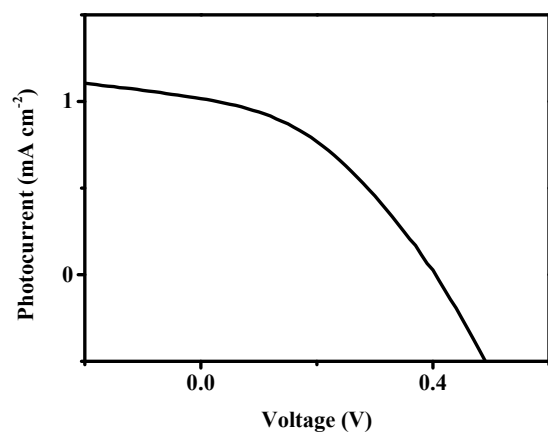

Figure S3 Current density vs. voltage curves of perovskite solar cells without C<sub>60</sub>

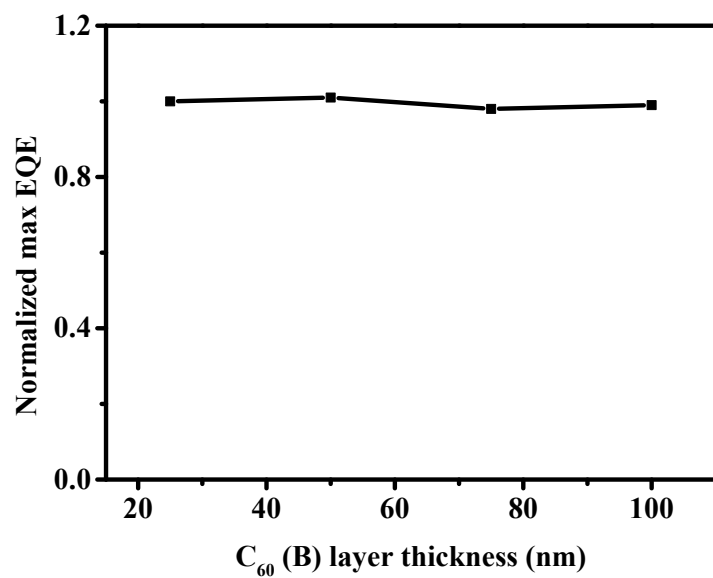

Figure S4 Normalized EQE of PDs with different thicknesses of C<sub>60</sub> (B) (@ 550 nm and -5V)
